# Supplementary material for: Whole Cell Screen for Inhibitors of pH Homeostasis in Mycobacterium tuberculosis
Source: PubMed Central journal article supplement (PMC3728290; doi:10.1371/journal.pone.0068942), 2013-07-30
Supplement: pone.0068942.s001.pdf [file pone.0068942.s001.pdf]

| <i>Microbial Origin</i>                                                                                     |                                                                                                               | <i>Plant Origin</i>                                                                                            |                                                                                                                   |
|-------------------------------------------------------------------------------------------------------------|---------------------------------------------------------------------------------------------------------------|----------------------------------------------------------------------------------------------------------------|-------------------------------------------------------------------------------------------------------------------|
| 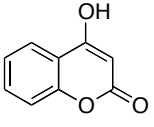<br><b>1G4</b>             | <br><b>1A8</b>               | <br><b>15E9</b>             | <br><b>19C9</b>                |
| <br><b>4D2</b>             | <br><b>8B2</b><br>Nornidulin | <br><b>17D7</b>             | <br><b>20E11</b>               |
| <br><b>3F11</b>            | <br><b>5D4</b><br>Lasalocid  | <br><b>16G7</b><br>Rapanone | <br><b>18H9</b>                |
| <br><b>8C6</b><br>Nidulin | <br><b>12H5</b>             |                                                                                                                | <br><b>23A6</b><br>Agrimophol |
| <br><b>1G9</b>           | <br><b>12G5</b>           |                                                                                                                |                                                                                                                   |
| <br><b>9B10</b>          | <br><b>12F10</b>           |                                                                                                                |                                                                                                                   |
