# Supplementary material for: Whole Cell Screen for Inhibitors of pH Homeostasis in Mycobacterium tuberculosis
Source: PubMed Central journal article supplement (PMC3728290; doi:10.1371/journal.pone.0068942), 2013-07-30
Supplement: pone.0068942.s002.pdf [file pone.0068942.s002.pdf]

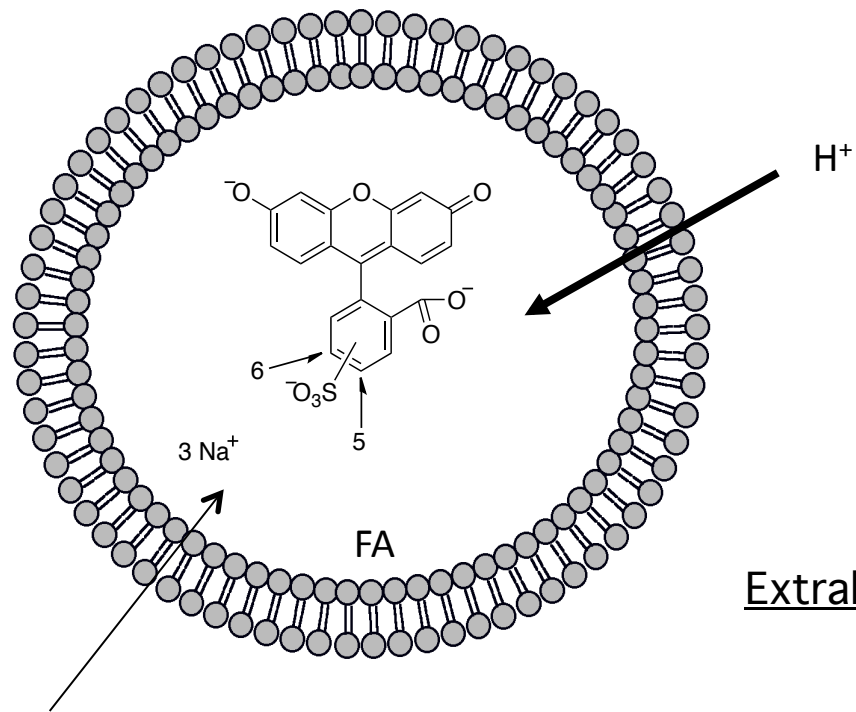

Intraliposomal Conditions

Fluorescein-5-(and-6)-sulfonic acid

pH = 7.4

Extraliposomal Conditions

+/- compound

pH = 6.4
