# Supplementary material for: Whole Cell Screen for Inhibitors of pH Homeostasis in Mycobacterium tuberculosis
Source: PubMed Central journal article supplement (PMC3728290; doi:10.1371/journal.pone.0068942), 2013-07-30

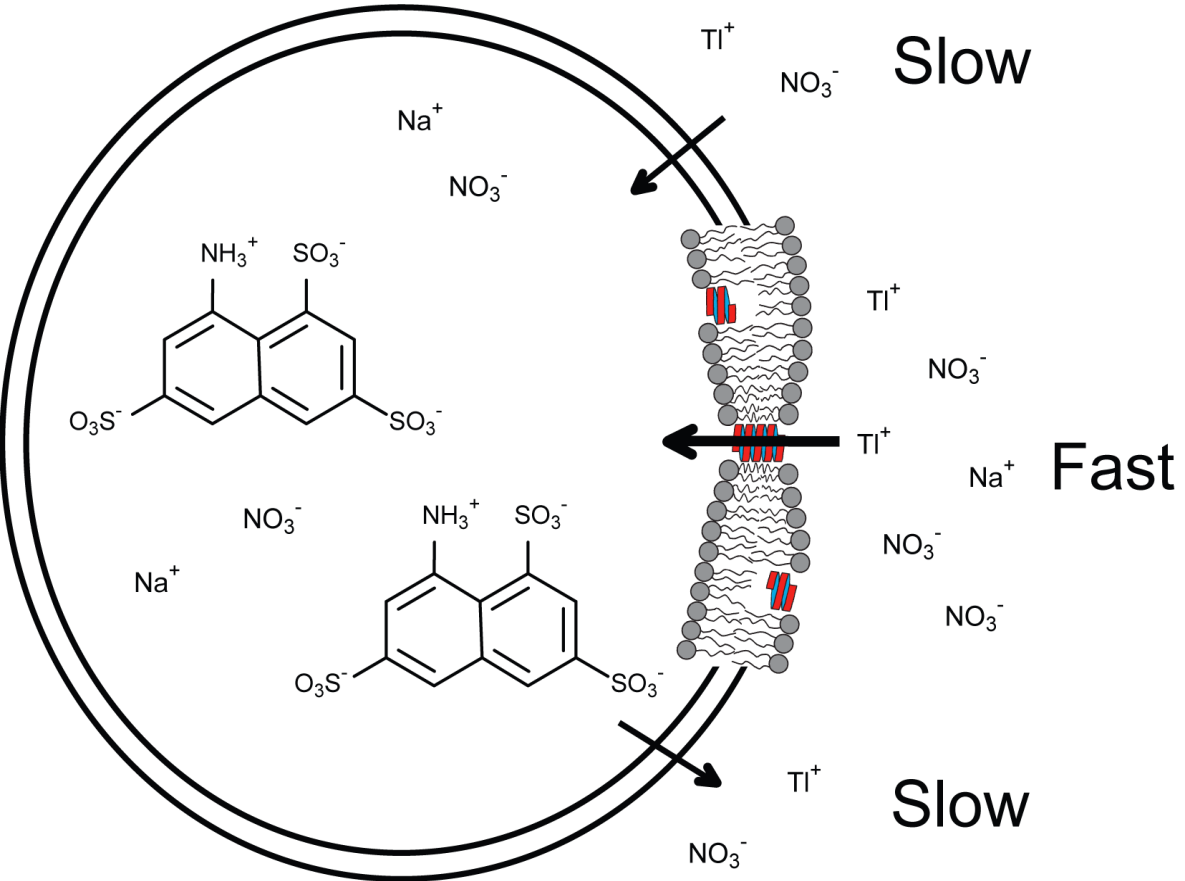

Supplement: pone.0068942.s003.pdf [file pone.0068942.s003.pdf]
